# Supplementary material for: Enhanced photocatalytic degradation of 2-thiobenzimidazole by the tris(8-quinolinolato)cobalt(iii) complex through peroxide adduct formation: theoretical and experimental investigations
Source: Royal Society of Chemistry journal article supplement (doi:10.1039/c9nj04027g), 2020-01-01
Supplement: c9nj04027g1.pdf [file c9nj04027g1.pdf]

## Supplementary

### Enhanced photocatalytic degradation of 2-thiobenzimidazole by *Tris*(8-quinolinolato)cobalt(III) complex through peroxide adduct formation: Theoretical and experimental investigation

Carlos Alberto Huerta Aguilar<sup>1</sup>, Jayanthi Narayanan<sup>1\*</sup>, José Abraham Balderas López<sup>2</sup>, Marcos Flores-Alamo<sup>3</sup>, Enrique Fernando Velázquez Contreras<sup>4</sup>, Karla Alejandra López Gastélum<sup>4</sup>, Fernando Rocha Alonzo<sup>4</sup>, Cristian Brayan Palacios Cabrera<sup>1</sup>, Alan Javier Santiago Cuevas<sup>1</sup>

<sup>1</sup> División de Ingeniería en Nanotecnología, Universidad Politécnica del Valle de México, Av. Mexiquense s/n esquina Av. Universidad Politécnica, Tultitlan, Estado de México, C.P. 54910, México.

<sup>2</sup> Instituto Politécnico Nacional-UPIBI, Avenida Acueducto S/N, Col. Barrio la Laguna, Del. Gustavo A. Madero, C. P. 07340, CDMX, México.

<sup>3</sup> Facultad de Química, Universidad Nacional Autónoma de México, Ciudad Universitaria, Coyoacán 04510, México D.F., México.

<sup>4</sup> Departamento de Investigación en Polímeros y Materiales, Universidad de Sonora, Blvd. Luis Encinas y Rosales S/N, Col. Centro, Hermosillo, Sonora, México.

Contact e-mail address: jnarayanan@upvm.edu.mx

**Fig. S1.** FTIR of 8-hydroxyquinoline

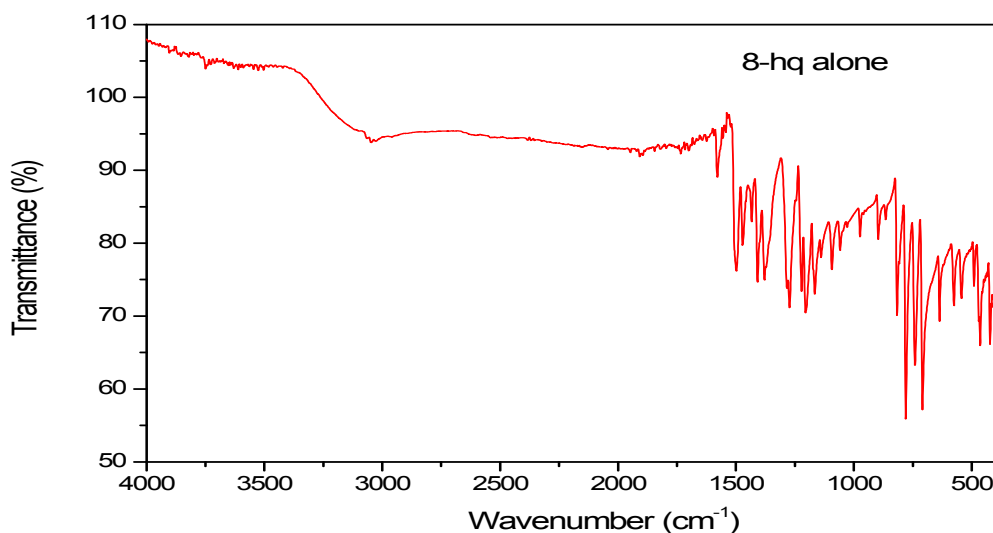

**Fig. S1.** FTIR of  $[\text{CrQ}_3 \cdot \text{C}_2\text{H}_5\text{OH}]$

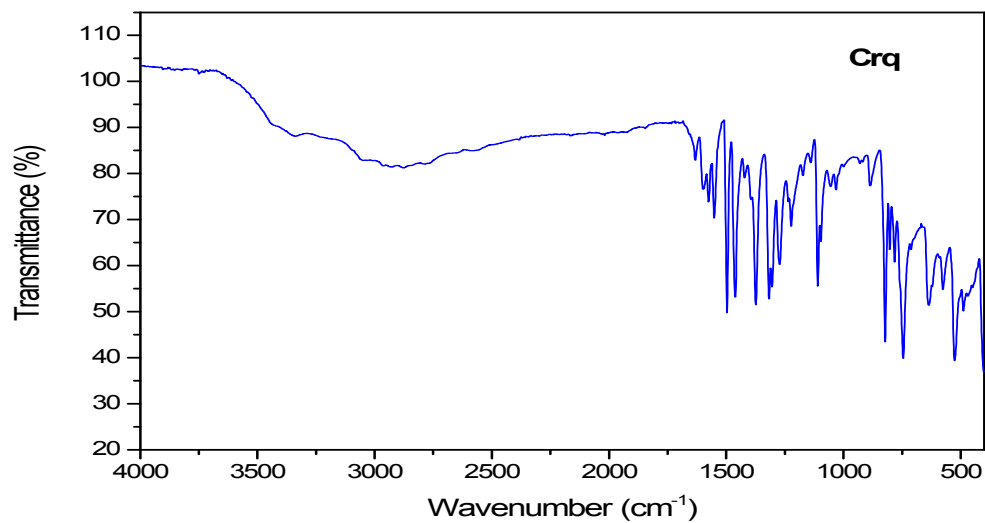

**Fig. S1.** FTIR of  $[\text{CoQ}_3 \cdot \text{C}_2\text{H}_5\text{OH}]$

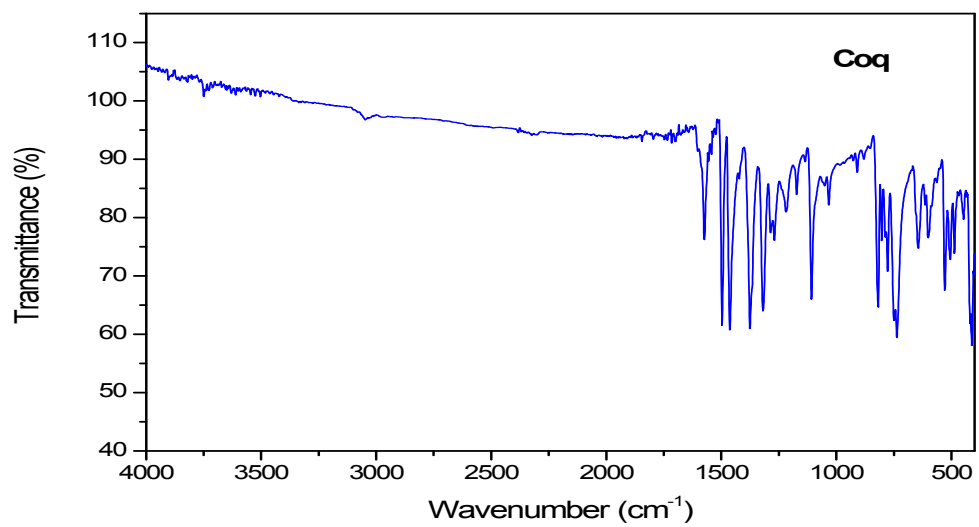

**Fig. S1.** FTIR of [FeQ3.C<sub>2</sub>H<sub>5</sub>OH]

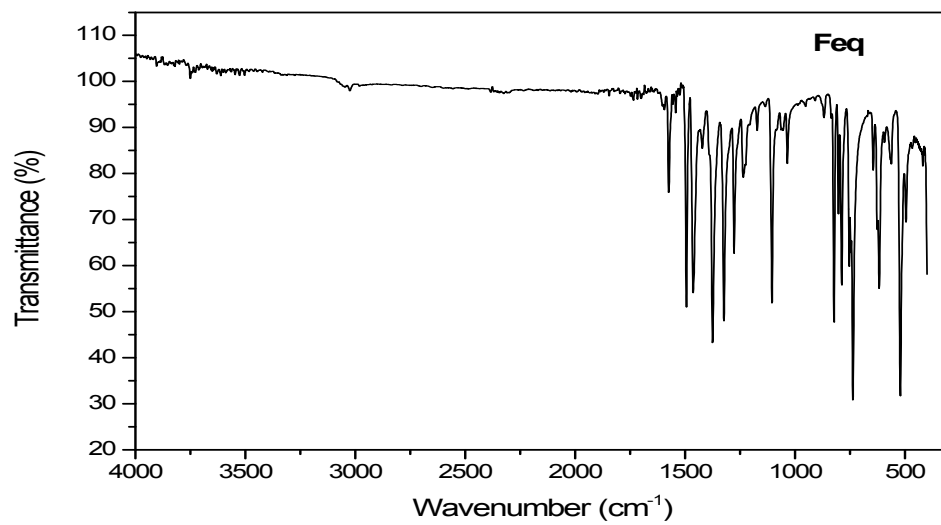

**Figure S2.**  $^1\text{H}$  NMR (Full) spectra of the metal complexes of 8-hydroxyquinoline with  $\text{Cr}^{3+}$ ,  $\text{Fe}^{3+}$ , and  $\text{Co}^{3+}$ .

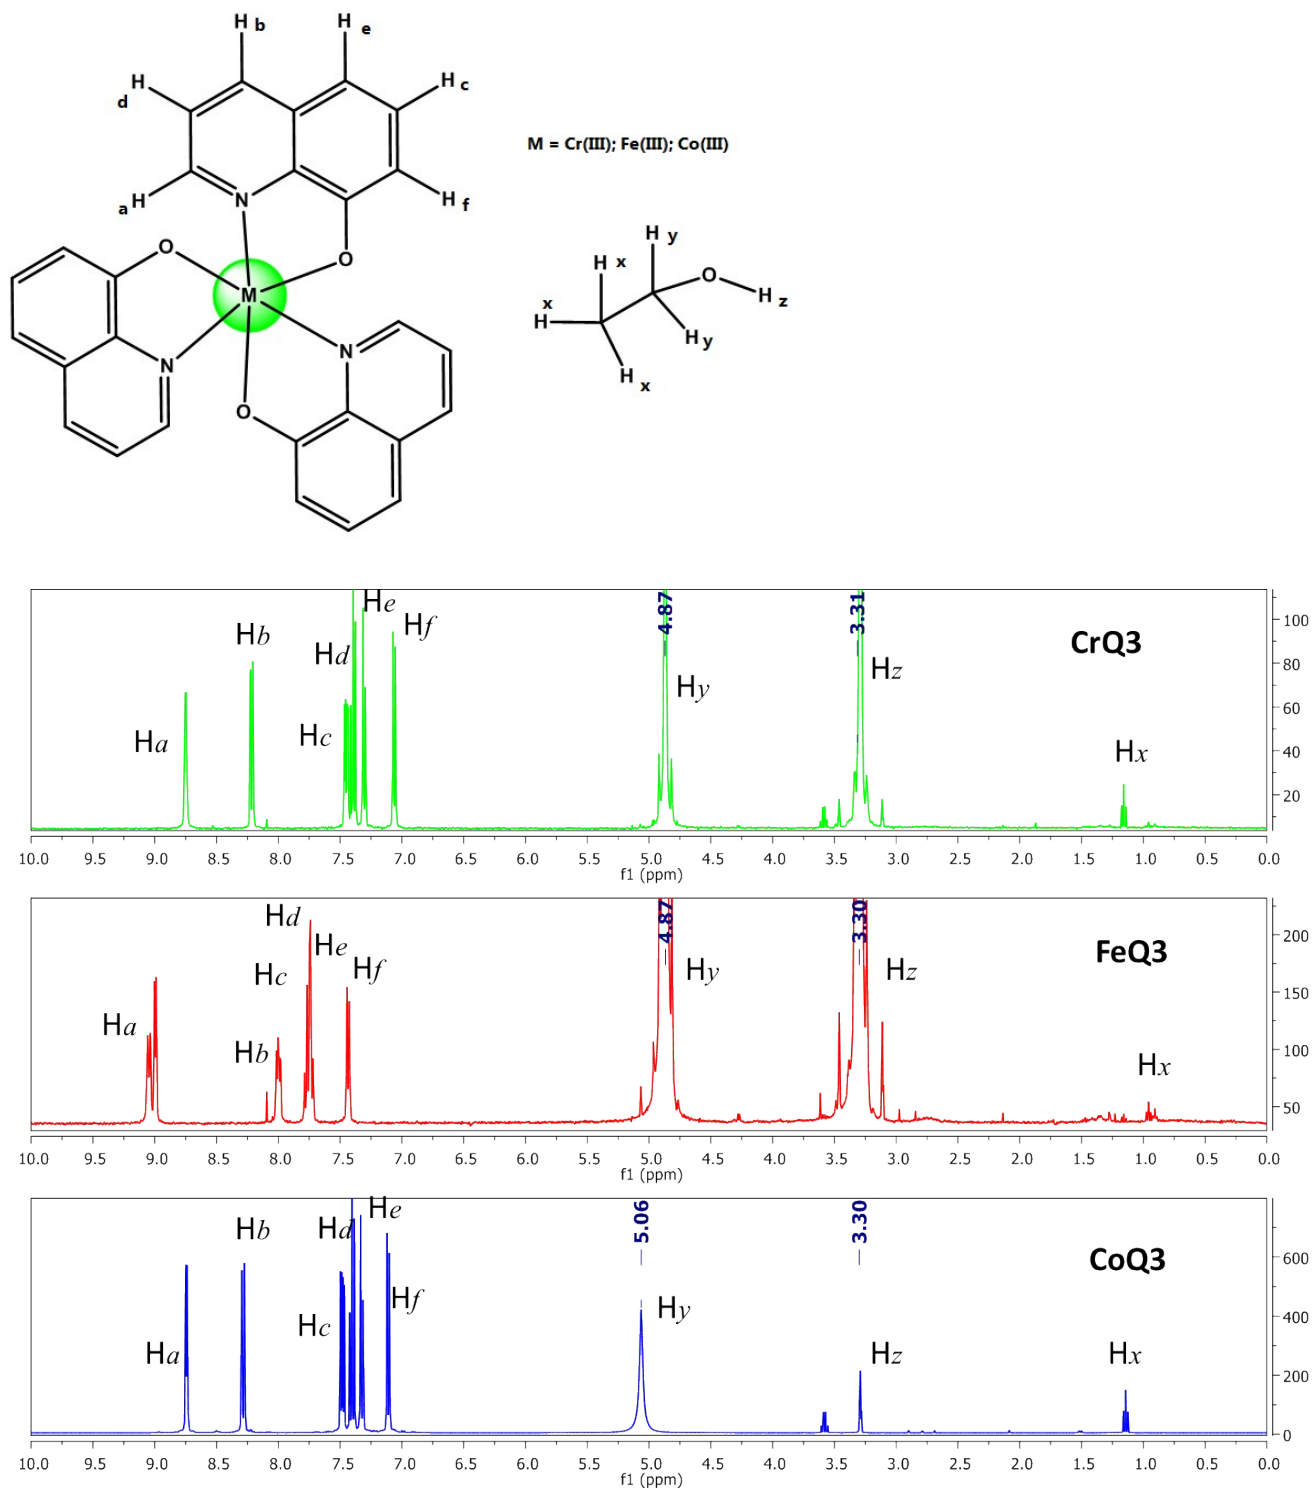

**Figure S2.**  $^1\text{H}$  NMR (Aromatic region) spectra of the metal complexes of 8-hydroxyquinoline with  $\text{Cr}^{3+}$ ,  $\text{Fe}^{3+}$ , and  $\text{Co}^{3+}$ .

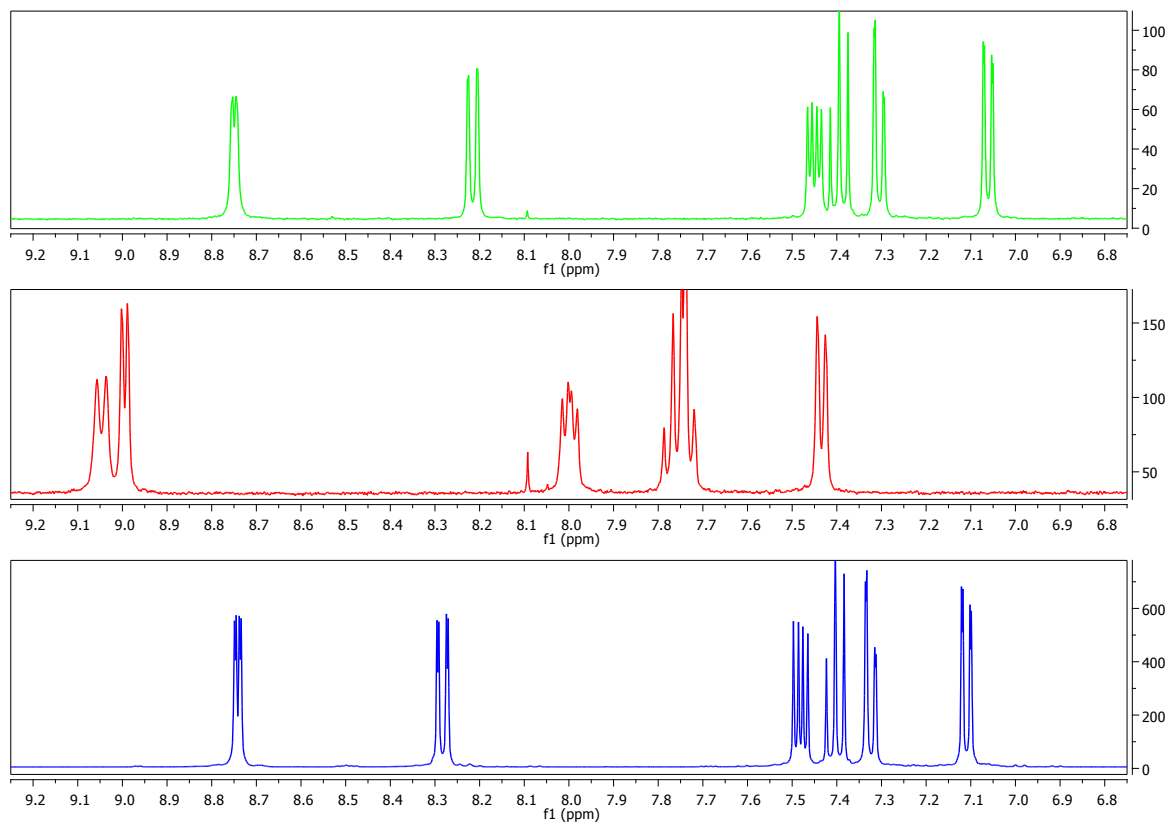

**Figure S2.**  $^1\text{H}$  NMR (Aliphatic region) spectra of the metal complexes of 8-hydroxyquinoline with  $\text{Cr}^{3+}$ ,  $\text{Fe}^{3+}$ , and  $\text{Co}^{3+}$ .

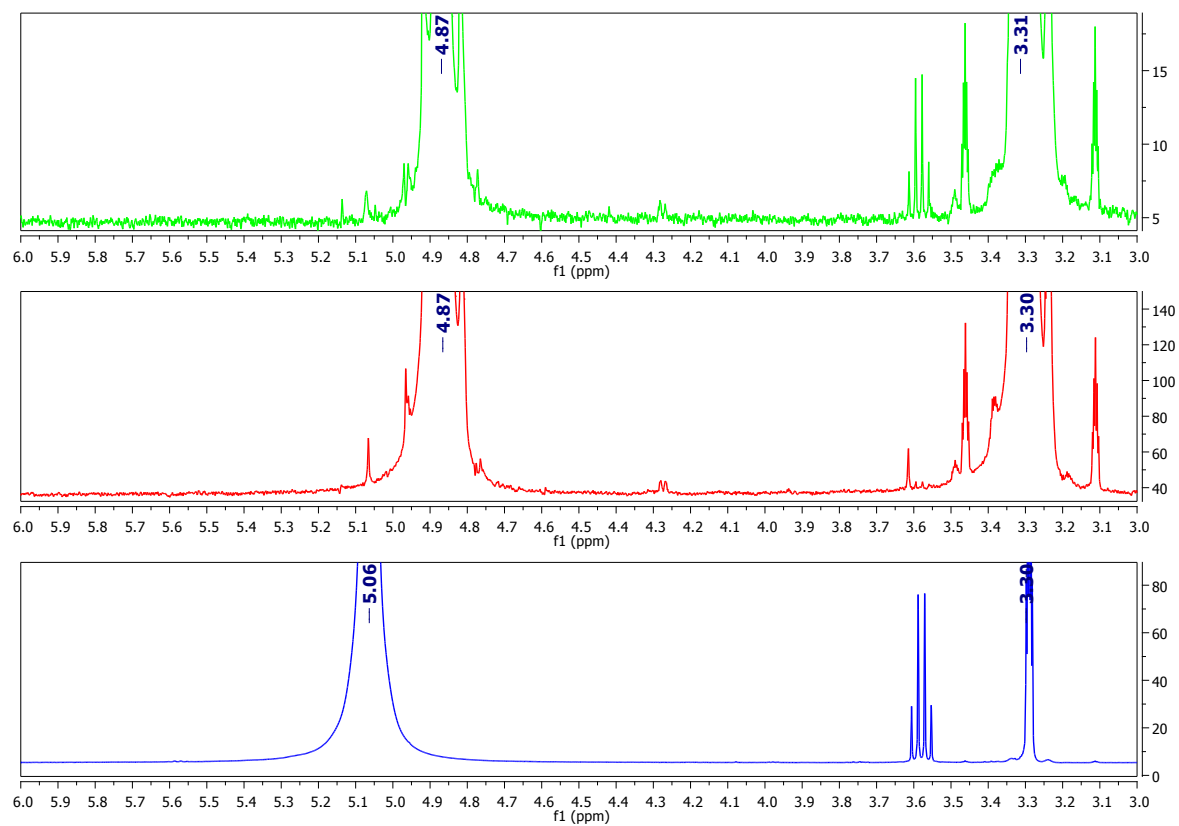

**Figure. S3** Pseudo first order kinetics for 2-TBI during the degradation by metal complexes at neutral pH ( $\text{pH}=4.0\pm 0.5$ ) without the visible light irradiation.

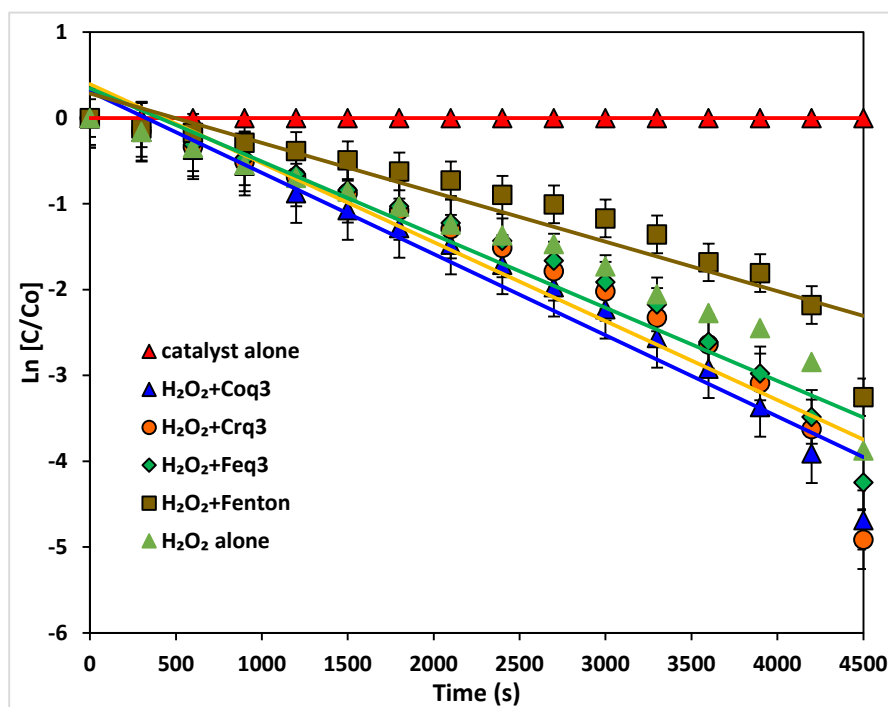

**Figure. S4.** Pseudo first order kinetics for 2-TBI during the degradation by metal complexes at neutral pH ( $\text{pH}=4.0\pm 0.5$ ) under visible light irradiation.

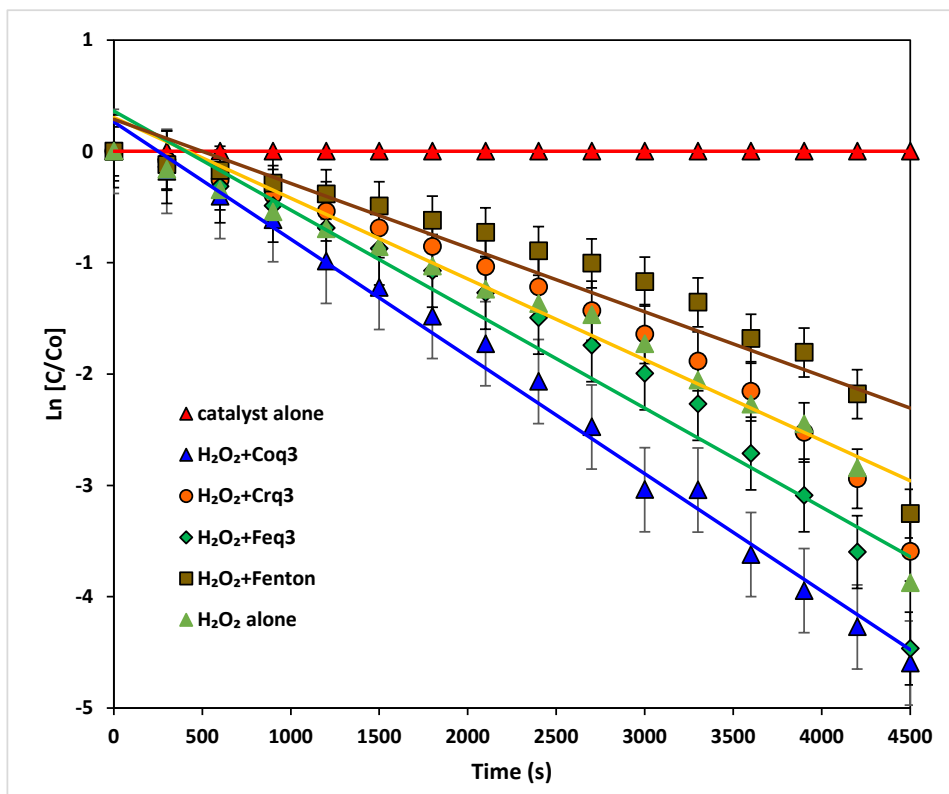



**Figure S5.**  $^1\text{H}$  NMR (400 MHz) spectra for oxidized product of 2-TBI; a) aromatic region of 2-TBI standard; b) aliphatic region of 2-TBI standard; c) aromatic region of 2-TBI after 3hrs photocatalysed oxidation with **CoQ3**; d) aliphatic region of 2-TBI after 3hrs photocatalysed oxidation with **CoQ3**.

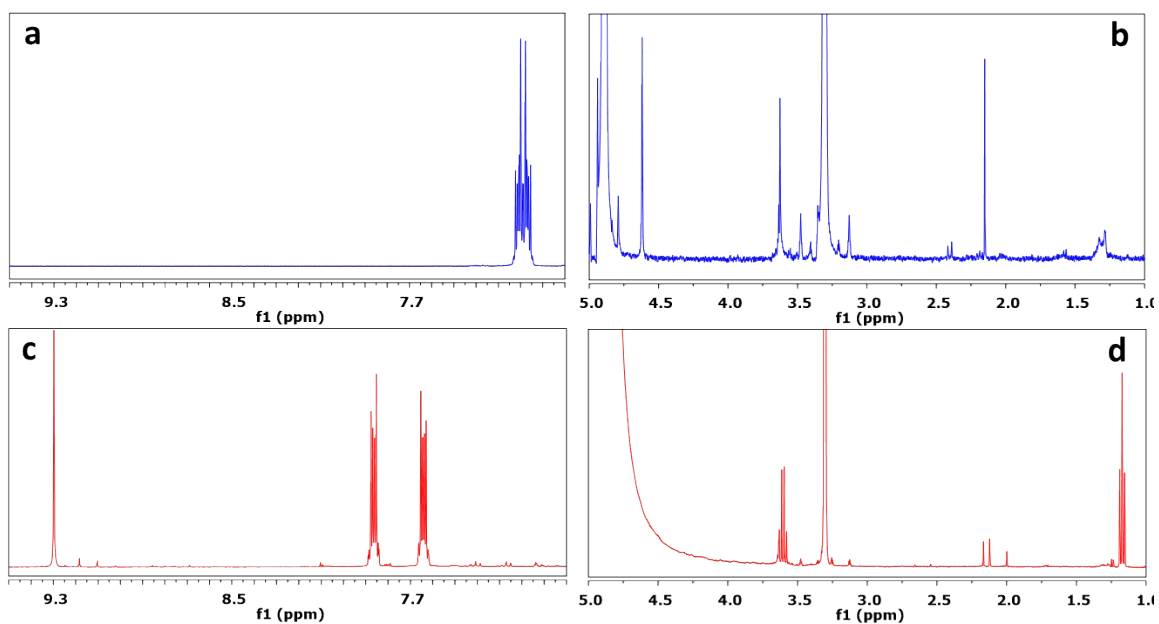

**Figure S6.** Electronic configuration for the metal complexes of HQ ligand (Degeneracy threshold 0.004 Hf)

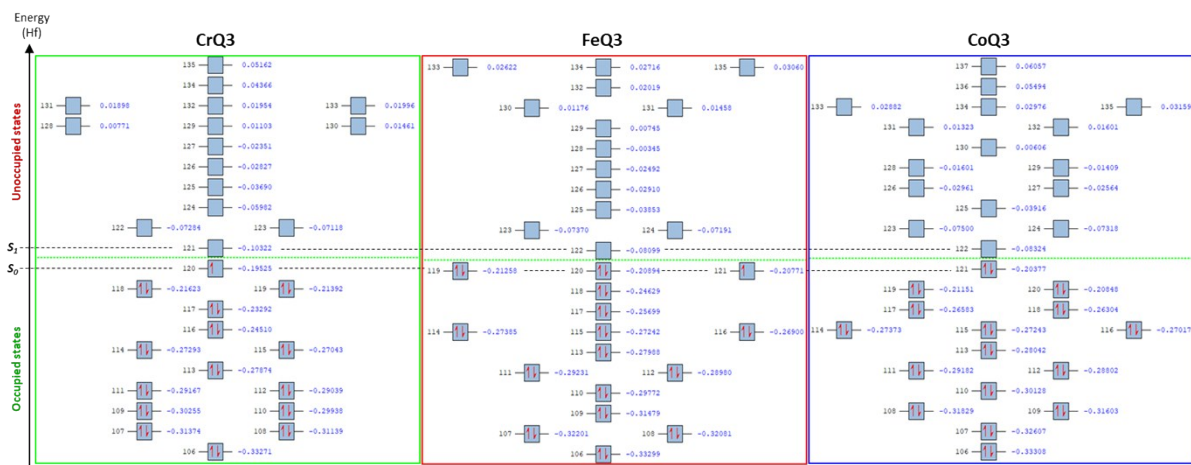

**Table S1.** Comparison of FTIR spectral vibrations of 8-HQ and its metal complexes

| Type of vibration and assignments                                                   | Range (cm <sup>-1</sup> ) and Intensity | Frequency (cm <sup>-1</sup> ) and Intensity (multiplicity) |               |               |                  |  |
|-------------------------------------------------------------------------------------|-----------------------------------------|------------------------------------------------------------|---------------|---------------|------------------|--|
|                                                                                     |                                         | 8-HQ alone                                                 | CoQ3          | FeQ3          | CrQ3             |  |
| C-N-C in amines (bend)                                                              | 510-400s                                | 423w, 463w, 490w                                           | 414m, 499m(d) | 416vw,492m    | -----            |  |
| Ring in benzene derivatives (in plane and out of plane ring deformations-two bands) | 580-420m-s                              | 545w (d)                                                   | 527m          | 520m, 562vs   | 520vs, 559w      |  |
| Pyridine ring (in plane ring formation)                                             | 635-605m-s                              | 635m                                                       | 643m          | 616m, 646w    | 616s, 644w       |  |
| Ar-OH in phenol (OH out of plane deformation)                                       | 720-600s-br                             | 709vs                                                      | -----         | -----         | -----            |  |
| O-H bend (out-of-plane)                                                             | 650-770m-w                              | 739s, 783s                                                 | 733m, 778m    | 736vs         | 735vs, 754m      |  |
| =C-H & =CH <sub>2</sub> (out-of-plane bending)                                      | 780-850m                                | -----                                                      | 819m          | 821vs         | 801m, 821m       |  |
| CH <sub>2</sub> =CH- (-CH <sub>2</sub> out of plane wag)                            | 950-900vs                               | 898w (d), 974vw                                            | 910vw (d)     | 868vw         | 868vw            |  |
| C-O-H in alcohols (C-O stretch)                                                     | 1200-1015vs                             | 1097w, 1166m, 1204m                                        | 1106m, 1169w  | 1105vs, 1172w | 1105s, 1173w     |  |
| C-N in aromatic amines                                                              | 1280-1180s                              | 1223m, 1273m                                               | 1216w, 1276w  | 1234m, 1276vs | 1232w (d), 1277m |  |
| Ring vibrations in plan (C-H) deformation                                           | 1330-1300s                              | -----                                                      | 1318w         | 1320vs        | 1321s            |  |
| O-H bending (in-plane)                                                              | 1330-1430s                              | 1381m (d)                                                  | 1372m         | 1376 vs       | 1373vs           |  |
| α-CH <sub>2</sub> bending                                                           | 1400-1450s                              | -----                                                      | 1462m         | 1463s         | 1462vs           |  |
| Benzene ring in aromatic compounds (ring stretch, Sharp bands)                      | 1515-1485m                              | 1501m (d)                                                  | 1497s         | 1495s         | 1497vs           |  |

|                                                               |            |       |       |       |       |  |
|---------------------------------------------------------------|------------|-------|-------|-------|-------|--|
| Pyridine derivatives                                          | 1615-1565s | 1580w | 1574m | 1572m | 1574m |  |
| $\nu(\text{OH})$ stretching<br>vibration of phenolic<br>group | 3200-3000m | 3040m | ----- | ----- | ----- |  |
